# Supplementary material for: Nosocomial Outbreak of SARS-CoV-2 in a “Non-COVID-19” Hospital Ward: Virus Genome Sequencing as a Key Tool to Understand Cryptic Transmission
Source: PubMed Central journal article supplement (PMC8065743; doi:10.3390/v13040604), 2021-04-01
Supplement: viruses-13-00604-s001.pdf [file viruses-13-00604-s001.pdf]

## Supplementary Material

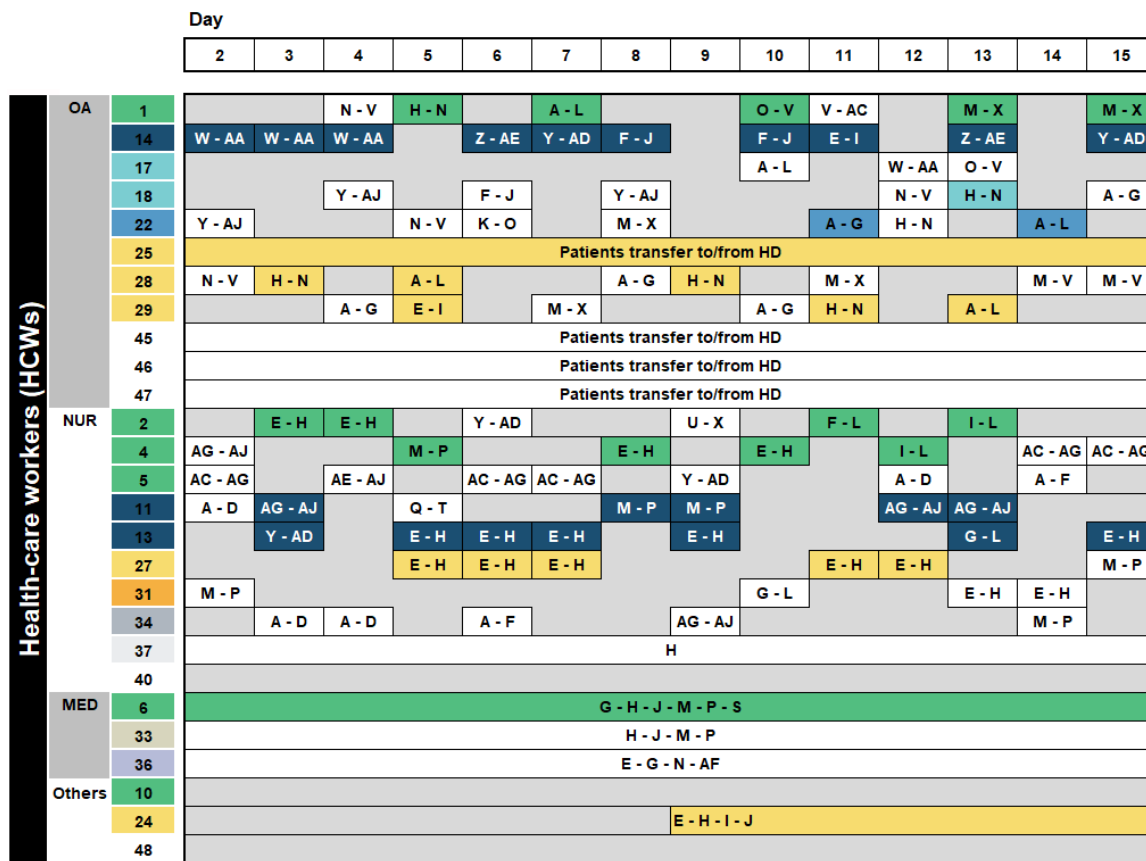

**Figure S1. Timeline of HCW-patient contacts before the large screening.** HCW and patient codes are colored according to the phylogenetic placement of the respective SARS-CoV-2 consensus sequences (Figure 1A), with the exception of those without SARS-CoV-2 genome data (gray numbers in white fields). The timeline (matching that of Figure 1, in which day 1 corresponds to the first day of the 15-day period before the large screening) summarizes the visits of infected HCWs to patient's rooms (identified by capital letters, in alphabetical order, from A to Z, followed by AA to AJ). Whenever a HCW visited a room with a patient with identical viral consensus sequence (i.e., same genetic profile), the field is colored according to the genetic profile (as in Figure 1A) (i.e., cases with the highest likelihood of direct transmission). HD, hemodialysis.

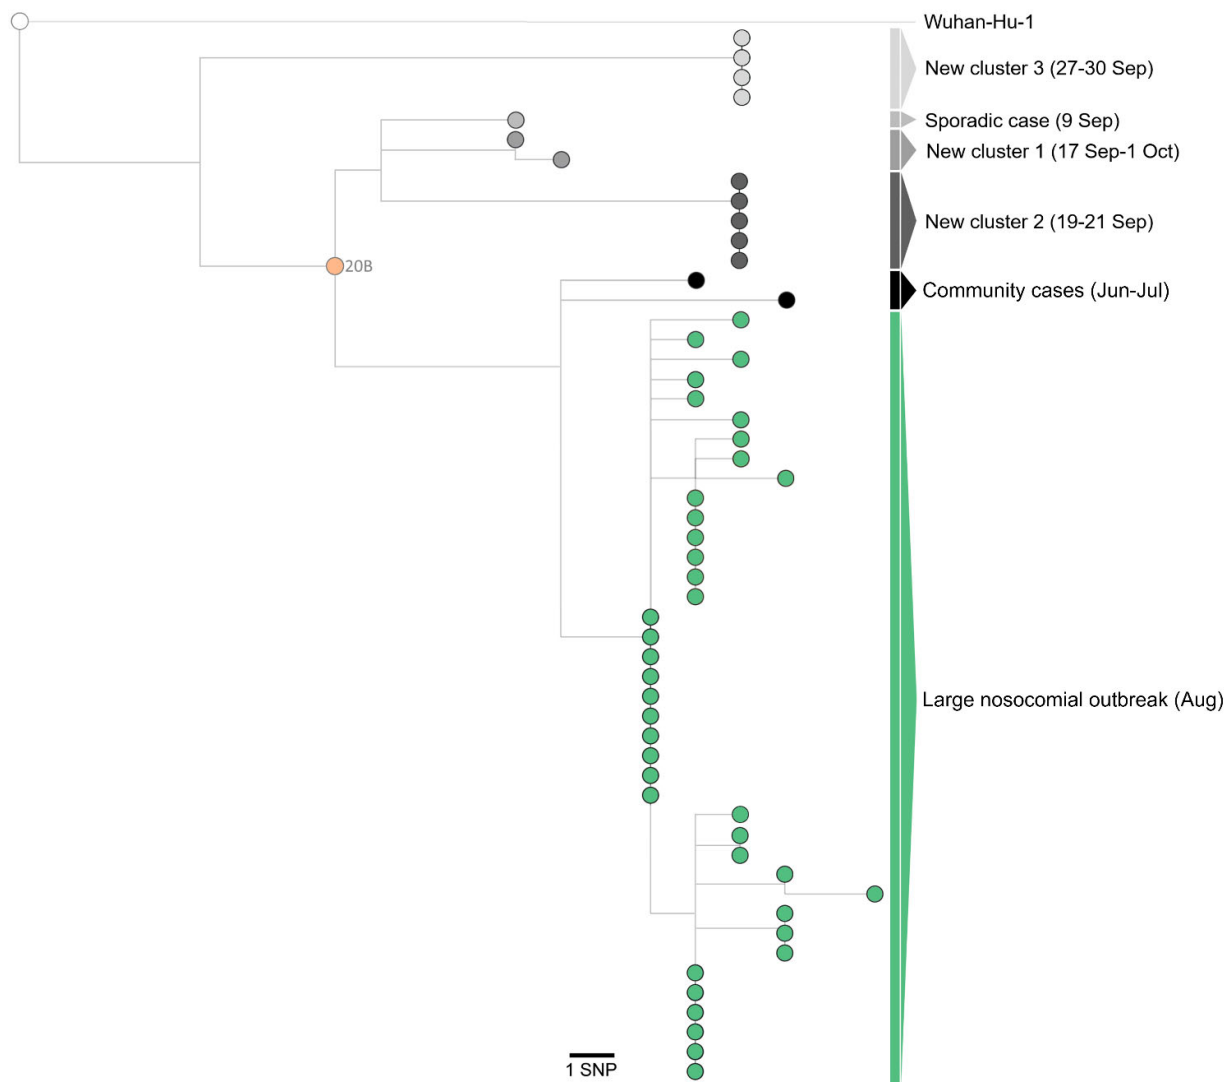

**Figure S2. Independent hospital introductions of SARS-CoV-2 cases after the large nosocomial outbreak led to limited transmission chains.** Maximum likelihood phylogenetic tree of SARS-CoV-2 genome sequences analysed during the investigation of SARS-CoV-2 positive cases detected in a non-COVID-19 ward of a large hospital in Portugal, between August and October 2020. The tree includes viral consensus sequences analyzed during the large nosocomial outbreak ( $n = 40$ ) in August (presented in the same order as in Figure 2), as well as 11 out of 15 new positive cases detected between 9 September and 1 October. To provide better phylogenetic context, the two closest sequences of the outbreak SARS-CoV-2 variant detected in community (Portugal/PT1550/2020, collected in 21 June 2020, and Portugal/PT1614/2020, collected in 8 July 2020; <https://insaflu.insa.pt/covid19/>; as of 9 November 2020) and the SARS-CoV-2 reference genome sequence (used as root; Wuhan-Hu-1/2019; MN908947.3) were also included.

**Supplementary Table S1.** List of outbreak-related SARS-CoV-2 genome sequences generated in this study.

| <b>Sample designation</b> | <b>Patient / HCW code</b> | <b>GISAID Accession ID</b> |
|---------------------------|---------------------------|----------------------------|
| Portugal/PT1701/2020      | 1                         | EPI_ISL_693630             |
| Portugal/PT1702/2020      | 2                         | EPI_ISL_693631             |
| Portugal/PT1703/2020      | 3                         | EPI_ISL_693632             |
| Portugal/PT1704/2020      | 4                         | EPI_ISL_693633             |
| Portugal/PT1705/2020      | 5                         | EPI_ISL_693634             |
| Portugal/PT1706/2020      | 6                         | EPI_ISL_693635             |
| Portugal/PT1707/2020      | 7                         | EPI_ISL_693523             |
| Portugal/PT1708/2020      | 8                         | EPI_ISL_693636             |
| Portugal/PT1709/2020      | 9                         | EPI_ISL_693520             |
| Portugal/PT1710/2020      | 10                        | EPI_ISL_693637             |
| Portugal/PT1711/2020      | 11                        | EPI_ISL_693638             |
| Portugal/PT1712/2020      | 12                        | EPI_ISL_693639             |
| Portugal/PT1713/2020      | 13                        | EPI_ISL_693640             |
| Portugal/PT1714/2020      | 14                        | EPI_ISL_693641             |
| Portugal/PT1715/2020      | 15                        | EPI_ISL_693642             |
| Portugal/PT1716/2020      | 16                        | EPI_ISL_693643             |
| Portugal/PT1717/2020      | 17                        | EPI_ISL_693644             |
| Portugal/PT1718/2020      | 18                        | EPI_ISL_693645             |
| Portugal/PT1719/2020      | 19                        | EPI_ISL_693646             |
| Portugal/PT1720/2020      | 20                        | EPI_ISL_693647             |
| Portugal/PT1721/2020      | 21                        | EPI_ISL_693648             |
| Portugal/PT1722/2020      | 22                        | EPI_ISL_693649             |
| Portugal/PT1723/2020      | 23                        | EPI_ISL_693519             |
| Portugal/PT1724/2020      | 24                        | EPI_ISL_693650             |
| Portugal/PT1725/2020      | 25                        | EPI_ISL_693651             |
| Portugal/PT1726/2020      | 26                        | EPI_ISL_693652             |
| Portugal/PT1727/2020      | 27                        | EPI_ISL_693653             |
| Portugal/PT1728/2020      | 28                        | EPI_ISL_693654             |
| Portugal/PT1729/2020      | 29                        | EPI_ISL_693518             |
| Portugal/PT1730/2020      | 30                        | EPI_ISL_693524             |
| Portugal/PT1731/2020      | 31                        | EPI_ISL_693655             |
| Portugal/PT1732/2020      | 32                        | EPI_ISL_693537             |
| Portugal/PT1733/2020      | 33                        | EPI_ISL_693656             |
| Portugal/PT1734/2020      | 34                        | EPI_ISL_693539             |
| Portugal/PT1735/2020      | 35                        | EPI_ISL_693534             |
| Portugal/PT1736/2020      | 36                        | EPI_ISL_693657             |
| Portugal/PT1737/2020      | 37                        | EPI_ISL_693536             |
| Portugal/PT1738/2020      | 38                        | EPI_ISL_693516             |
| Portugal/PT1739/2020      | 39                        | EPI_ISL_693535             |

**Supplementary Table S2.** Genome background of the outbreak-related SARS-CoV-2.

| <b>Genome position<sup>a</sup></b> | <b>Nucleotide change</b> | <b>Amino acid change</b>                         |
|------------------------------------|--------------------------|--------------------------------------------------|
| <b>241<sup>b,c</sup></b>           | C>T                      | (5'UTR)                                          |
| <b>1457<sup>c</sup></b>            | C>T                      | NSP2: R218C (non-syn) / ORF1a: R398C (non-syn)   |
| <b>3037<sup>b,c</sup></b>          | C>T                      | NSP3: F106F (syn) / ORF1a: F924F (syn)           |
| <b>6500</b>                        | C>T                      | NSP3: P1261S (non-syn) / ORF1a: P2079S (non-syn) |
| <b>7006<sup>c</sup></b>            | C>T                      | NSP3: T1429T (syn) / ORF1a: T2247T (syn)         |
| <b>14408<sup>b,c</sup></b>         | C>T                      | NSP12b: P314L (non-syn) / ORF1b: P314L (non-syn) |
| <b>22088<sup>c</sup></b>           | C>T                      | S: L176F (non-syn)                               |
| <b>23403<sup>b,c</sup></b>         | A>G                      | S: D614G (non-syn)                               |
| <b>24019<sup>c</sup></b>           | A>G                      | S: E819E (syn)                                   |
| <b>28846<sup>c</sup></b>           | C>T                      | N: R191R (syn)                                   |
| <b>28881-3<sup>b,c</sup></b>       | GGG>AAC                  | N: R203K, G204R (non-syn)                        |
| <b>29692</b>                       | G>T                      | (3'UTR)                                          |

<sup>a</sup> Genome positions refer to the reference SARS-CoV-2 Wuhan-Hu-1/2019 sequence (GenBank accession MN908947).

<sup>b</sup> Nextstrain 20B clade SNP markers.

<sup>c</sup> Mutations shared with not-related community-circulating virus (Portugal/PT1550/2020 and Portugal/PT1614/2020) detected in Lisbon and Tagus Valley region in June-July 2020 (<https://insaflu.insa.pt/covid19/>; as of 11 December 2020)

syn: synonymous mutation.

non-syn: non-synonymous mutation.
